# Supplementary material
Source: ML conference proceedings conference paper supplement (https://openaccess.thecvf.com/content/WACV2025/html/Sinha_CharDiff_Improving_Sampling_WACV_2025_paper.html)
Supplement: Supplementary file 1 [file Sinha_CharDiff_Improving_Sampling_WACV_2025_supplemental.pdf]

# Supplementary Material

## CharDiff: Improving Sampling Convergence via Characteristic Function Consistency in Diffusion Models

### 1. Proof of Eq. 1

**Remark 1** ([2]) *On a compact domain of Diameter  $D$ , 2-Wasserstein distance between two densities  $p$  and  $q$  is bounded by total variation norm,*

$$\mathcal{W}_2(p, q) = D \int |p(x) - q(x)| dx \quad (1)$$

From remark, we can further write it for ChF as,

$$\mathcal{W}_2(p, q) = \max_{|\mathbf{u}|} \mathcal{O}\left(\frac{1}{1 + |\mathbf{u}|^p}\right) \quad (2)$$

#### Proof 1

$$\begin{aligned} & \int \|s(\mathbf{x}, t) - s_\theta(\mathbf{x}, t)\|_2^2 p(\mathbf{x}) dx \\ &= \int \|\nabla_{\mathbf{x}_t} \log p(\mathbf{x}, t) - \nabla_{\mathbf{x}_t} \log p_\theta(\mathbf{x}, t)\|_2^2 p(\mathbf{x}) dx \end{aligned} \quad (3)$$

Lets assume  $T$  be an optimal transport map such that  $T_{\#}p = p_\theta$ . Using change of variables, we have,

$$p_\theta(T(\mathbf{x})) \det(\nabla T(\mathbf{x})) = p(\mathbf{x}) \quad (4)$$

$$\begin{aligned} \nabla_{\mathbf{x}} \log p_\theta(T(\mathbf{x})) &= \nabla_{\mathbf{x}} \log p(\mathbf{x}) + (\nabla_{\mathbf{x}} \log p_\theta(T(\mathbf{x})) \\ &\quad - \nabla_{\mathbf{x}} \log p(\mathbf{x})) \end{aligned} \quad (5)$$

We can further rewrite the equation 3,

$$\begin{aligned} & \int \|s(\mathbf{x}, t) - s_\theta(\mathbf{x}, t)\|_2^2 p(\mathbf{x}) dx \\ &= \int \|\nabla_{\mathbf{x}_t} \log p(\mathbf{x}, t) - \nabla_{\mathbf{x}_t} \log p(T(\mathbf{x}), t)\|_2^2 p(\mathbf{x}) dx \end{aligned} \quad (6)$$

Using Taylor's expansion, we have,

$$\begin{aligned} \nabla_{\mathbf{x}} \log p(T(\mathbf{x})) &= \nabla_{\mathbf{x}} \log p(\mathbf{x}) + \nabla_{\mathbf{x}}^2 \log p(\mathbf{x})(T(\mathbf{x}) - \mathbf{x}) \\ \implies \|\nabla_{\mathbf{x}} \log p(T(\mathbf{x})) - \nabla_{\mathbf{x}} \log p(\mathbf{x})\|_2^2 &\leq \frac{1}{\lambda_q} \|T(\mathbf{x}) - \mathbf{x}\|_2^2, \end{aligned} \quad (7)$$

where  $\lambda_q$  is the smallest eigenvalue of Fisher information. Finally, we write Eq. 6 as,

$$\begin{aligned} & \sqrt{\int \|s(\mathbf{x}, t) - s_\theta(\mathbf{x}, t)\|_2^2 p(\mathbf{x}) dx} \\ &\leq \sqrt{\int \|T(x) - x\|_2^2 p(\mathbf{x}) dx} \\ &= \mathcal{W}_2(p_\theta, p) \end{aligned} \quad (8)$$

At last, we use 2 in 8 to get,

$$\sqrt{\int \|s(\mathbf{x}, t) - s_\theta(\mathbf{x}, t)\|_2^2 p(\mathbf{x}) dx} = \max_{|\mathbf{u}|} \mathcal{O}\left(\frac{1}{1 + |\mathbf{u}|^p}\right) \quad (9)$$

### 2. Proof of Proposition 1

From [4], the PDE for  $\phi(\mathbf{u})$  is given by,

$$\begin{aligned} \frac{\partial \phi(\mathbf{u})}{\partial t} &= i \sum_{k=1}^d u_k \mathbb{E}[e^{i\mathbf{u}^T \mathbf{x}} a_k(\mathbf{x})] \\ &\quad - \frac{1}{2} \sum_{k,l=1}^d u_k u_l \mathbb{E}[exp(i\mathbf{u}^T \mathbf{x}) \sum_{w=1}^{m_B} b_{kw}(\mathbf{x}) b_{lw}(\mathbf{x})], \end{aligned} \quad (10)$$

where the underlying diffusion process is given by,  $d\mathbf{x} = \mathbf{a}(\mathbf{x})dt + \mathbf{b}(\mathbf{x})d\mathbf{B}(t)$  with  $d\mathbf{B}(t)$  being a Brownian motion. For Score-SDE, we have  $\mathbf{a}(\mathbf{x}) = 0$  and  $\mathbf{b}(\mathbf{x}) = c(t)\mathbf{I}$  with  $c(t)$  as a function of time.

The Eq. 10 becomes,

$$\frac{\partial \phi(\mathbf{u})}{\partial t} = -\frac{d}{2} \|\mathbf{u}\|_2^2 c^2(t) \phi(\mathbf{u}) \quad (11)$$

### 3. Proof of Proposition 2

We start with applying Taylor series expansion and ignoring higher order terms of  $\mathbf{u}$ .

$$\begin{aligned}
& \|\phi(\mathbf{u}, \mathbf{x}_0) - \phi(\mathbf{u}, \hat{\mathbf{x}}_0)\|^2 \\
&= \left\| e^{i\mathbf{u}^T \sqrt{\bar{\alpha}_t} \mathbf{x}_0} - e^{i\mathbf{u}^T \sqrt{\bar{\alpha}_t} \hat{\mathbf{x}}_0} \right\|^2 e^{-0.5\sigma_t^2 \|\mathbf{u}\|_2^2} \\
&\approx \bar{\alpha}_t \|\mathbf{x}_0 - \hat{\mathbf{x}}_0\|_2^2 \|\mathbf{u}\|_2^2 e^{-0.5\sigma_t^2 \|\mathbf{u}\|_2^2} \\
&= \bar{\alpha}_t \left\| \frac{1}{\sqrt{\bar{\alpha}_t}} \left( \mathbf{x}_t - (1 - \bar{\alpha}_t) \nabla_{\mathbf{x}} \log p(\mathbf{x}, t) \right) \right. \\
&\quad \left. - \frac{1}{\sqrt{\bar{\alpha}_t}} \left( \mathbf{x}'_t - (1 - \bar{\alpha}_t) s_\theta(\mathbf{x}, t) \right) \right\|_2^2 e^{-0.5\sigma_t^2 \|\mathbf{u}\|_2^2} \\
&\leq \|\mathbf{x}_t - \mathbf{x}'_t\|_2^2 + (1 - \bar{\alpha}_t) \|\nabla_{\mathbf{x}} \log p(\mathbf{x}, t) - s_\theta(\mathbf{x}, t)\|_2^2 \|\mathbf{u}\|_2^2
\end{aligned} \tag{12}$$

For forward and reverse distributions as time  $t$ ,  $\mathbb{Q}_t = \mathbb{P}_{T-t}$ . Assuming that  $x_t$  and  $x'_t$  are sampled from nearly identical distribution, the bound over the distance can be found by using Chernoff inequality. Substituting this inequality completes the proof.

### 4. Proof of Theorem 1

We first show that,

$$\mathcal{W}_2^2(p, q) \leq \mathbb{E}_{\mathbf{u}} [\|\phi_P(\mathbf{u}) - \phi_Q(\mathbf{u})\|^2] \tag{13}$$

**Proof 2** From [1],

$$\begin{aligned}
\mathcal{W}_2^2(p, q) &\leq 4 \int |m| |F_P(m) - F_Q(m)| dm \\
&\leq 4 \int |m| \left| \int_{-\infty}^m (p(s) - q(s)) ds \right| dm \\
&\leq 4 \int |m| \int_{-\infty}^{\infty} |p(s) - q(s)| ds dm \\
&\leq 4 \int |m| dm \int_{-\infty}^{\infty} |p(s) - q(s)| ds \\
&\leq 4 \int |m| dm \int_{-\infty}^{\infty} \left| \frac{1}{(2\pi)^d} \int_{-\infty}^{\infty} (\phi_P(u) - \phi_Q(u)) e^{-ius} du \right| ds \\
&\leq 4 \int |m| dm \int_{-\infty}^{\infty} \left| \frac{1}{(2\pi)^d} \int_{-\infty}^{\infty} (\phi_P(u) - \phi_Q(u)) du \right| ds \\
&\leq 4 \int |m| dm \int_{-\infty}^{\infty} ds \left( \frac{1}{(2\pi)^d} \int_{-\infty}^{\infty} |\phi_P(u) - \phi_Q(u)| du \right)
\end{aligned} \tag{14}$$

Since the samples are drawn from a normal distribution, it can be assumed that for some  $\delta$ ,  $\int |m| dm \approx \int_{(1-\delta)\mu_t}^{(1+\delta)\mu_t} |m| dm$  with probability of at least  $1 - 2e^{-\frac{\delta^2 \mu_t^2}{2\sigma_t^2}}$ .

$$\mathcal{W}_2^2(p, q) \leq \frac{16\mu_t^2 \delta^2}{(2\pi)^d} \mathbb{E}_{\mathbf{u}} [\|\phi_P(u) - \phi_Q(u)\|] \tag{15}$$

From [3], it is known that,

$$\mathcal{FID}(p, q) = \mathcal{FD}(\mathcal{I}_{\#} p, \mathcal{I}_{\#} q) \leq 2\mathcal{W}_2^2(\mathcal{I}_{\#} p, \mathcal{I}_{\#} q) \leq 2L^2 \mathcal{W}_2^2(p, q), \tag{16}$$

where  $\mathcal{I}$  is the Inception Network, and  $L$  is the Lipschitz constant for  $\mathcal{I}$ . Substituting 16 in 15 completes the proof.

### 5. Proof of Theorem 2

**Proof 3**

$$\begin{aligned}
\nabla_{\mathbf{x}_t} \mathcal{L} &= (\hat{\phi}(\mathbf{u}) - \phi(\mathbf{u}))^T \nabla_{\mathbf{x}_t} (\hat{\phi}(\mathbf{u}) - \phi(\mathbf{u})) \\
&= \underbrace{(\mathbb{E}[e^{\mathbf{u}^T \hat{\mathbf{X}}}] - \mathbb{E}[e^{\mathbf{u}^T \mathbf{X}}])}_{C} (i\mathbf{u}^T e^{i\mathbf{u}^T \mathbf{x}_t} - \\
&\quad i\mathbf{u}^T e^{j\mathbf{u}^T \sqrt{\bar{\alpha}_t} \mu} - 0.5\mathbf{u}^T \sigma_t \mathbf{u} \nabla_{\mathbf{x}_t} (\sqrt{\bar{\alpha}_t} \mu))
\end{aligned} \tag{17}$$

Now,  $C$  can be thought of as discretization error due to finite sampling in the following way,

$$\begin{aligned}
C &\approx i\mathbf{u}^T \mathbb{E}[\hat{\mathbf{X}} - \mathbf{X}] \\
&= i\mathbf{u}^T \delta_{discrete}
\end{aligned} \tag{18}$$

$$\nabla_{\mathbf{x}_t} (\sqrt{\bar{\alpha}_t} \mu) = \mathbb{I} - \frac{1 - \alpha_t}{\sqrt{1 - \bar{\alpha}_t}} \nabla_{\mathbf{x}_t}^2 \log p_\theta \tag{19}$$

It is to be noted that  $e^{ip} = \cos(p) + i\sin(p)$ . Substituting  $C$  and  $\nabla_{\mathbf{x}_t} (\sqrt{\bar{\alpha}_t} \mu)$ , and taking  $\nabla_{\mathbf{x}_t} \mathcal{L} = \text{Real}(\nabla_{\mathbf{x}_t} \mathcal{L}) + \text{Im}(\nabla_{\mathbf{x}_t} \mathcal{L})$ , We get,

$$\begin{aligned}
\nabla_{\mathbf{x}_t} \mathcal{L} &= \mathbf{u}^T \delta_{discrete} \mathbf{u}^T \left( \left( \cos\left(\frac{\mathbf{u}^T \mathbf{x}_t}{2}\right) - \sin\left(\frac{\mathbf{u}^T \mathbf{x}_t}{2}\right) \right)^2 + \right. \\
&\quad \left. e^{-\sigma_t^2 \|\mathbf{u}\|_2^2} \left( \cos\left(\frac{\mathbf{u}^T \mu_t}{2}\right) - \sin\left(\frac{\mathbf{u}^T \mu_t}{2}\right) \right) (\mathbb{I} \right. \\
&\quad \left. - \frac{1 - \alpha_t}{\sqrt{1 - \bar{\alpha}_t}} \nabla_{\mathbf{x}_t}^2 \log p_\theta) \right)
\end{aligned} \tag{20}$$

Taking Expectation over  $\mathbf{u}$ , we get,

$$\nabla_{\mathbf{x}_t} \mathbb{E}_{\mathbf{u}}[\mathcal{L}] = \mathcal{A} + \mathcal{B} (\mathbb{I} - \nabla_{\mathbf{x}_t}^2 \log p_\theta), \tag{21}$$

where  $\mathcal{A} = \mathbb{E} \left[ \mathbf{u}^T \delta_{discrete} \mathbf{u} \left( \cos\left(\frac{\mathbf{u}^T \mathbf{x}_t}{2}\right) - \sin\left(\frac{\mathbf{u}^T \mathbf{x}_t}{2}\right) \right)^2 \right]$ ,  $\mathcal{B} = \mathbb{E} \left[ e^{-\sigma_t^2 \|\mathbf{u}\|_2^2} \mathbf{u}^T \delta_{discrete} \mathbf{u} \left( \cos\left(\frac{\mathbf{u}^T \mu_t}{2}\right) - \sin\left(\frac{\mathbf{u}^T \mu_t}{2}\right) \right)^2 \right]$ , where we use the identity  $\cos x - \sin x = (\cos \frac{x}{2} - \sin \frac{x}{2})^2$

## References

- [1] Victor M. Panaretos and Yoav Zemel. Statistical aspects of wasserstein distances. *Annual Review of Statistics and Its Application*, 6(1):405–431, Mar. 2019. [2](#)
- [2] Gabriel Peyré and Marco Cuturi. Computational optimal transport, 2020. [1](#)
- [3] Litu Rout, Alexander Korotin, and Evgeny Burnaev. Generative modeling with optimal transport maps. In *International Conference on Learning Representations*, 2022. [2](#)
- [4] Wayne Isaac Tan Uy and Mircea Grigoriu. Neural network representation of the probability density function of diffusion processes, 2020. [1](#)
